# Supplementary material for: Distinct genomic landscape of Chinese pediatric acute myeloid leukemia impacts clinical risk classification
Source: PubMed Central journal article supplement (PMC8960760; doi:10.1038/s41467-022-29336-y), 2022-03-28
Supplement: 41467_2022_29336_MOESM1_ESM.pdf [file 41467_2022_29336_MOESM1_ESM.pdf]

**Supplementary Information for**

**Distinct genomic landscape of Chinese pediatric acute myeloid leukemia  
impacts clinical risk classification**

Table of Contents

Supplementary Results.....2

Supplementary Figures.....3

## Supplementary Results

### **Comparison of clinical impact of driver genomic aberrations between SCMC and TARGET pediatric AML**

We compared prognosis of Chinese (SCMC cohort) and Western (TARGET cohort) pediatric AML for each driver genomic aberration, including fusions (*KMT2A* rearrangements as a whole, *KMT2A-MLLT3*, *KMT2A-MLLT10*, *RUNX1-RUNX1T1*, *CBFA2T3-GLIS2*, *CBFB-MYH11* and *NUP98-NSD1*) and mutations (*FLT3* mutations and ITDs, *KIT*, *NRAS*, *KRAS*, *CEBPA* and *PTPN11*). Patients with age<15 were included in this analysis (n=498 in TARGET and n=288 in SCMC). No statistically significant difference was observed between the two cohorts, indicating a consistent clinic impact for these shared driver aberrations between Chinese and Western cohort (Supplementary Figure 6a). We further checked patients carrying *KMT2A* rearrangements with different partners. As shown in Supplementary Figure 6b-c, pediatric AML carrying *KMT2A-MLLT3* (*MLL-AF9*) fusion showed a statistically significant better prognosis (event-free survival,  $P=0.007$ ) as compared to other *KMT2A* rearranged AML in TARGET cohort. A similar trend was observed in SCMC cohort without a statistic significance ( $P=0.184$ ). Meanwhile, no significant difference of prognosis was observed between SCMC and TARGET cohort carrying either *KMT2A-MLLT3* ( $P=0.565$ ) or other *KMT2A* rearrangements ( $P=0.174$ ). However, we noticed that SCMC patients carrying *KMT2A* rearrangements other than *KMT2A-MLLT3* showed a trend of better prognosis compared to TARGET cohort. This might because of different fusion partners in *KMT2A* rearrangements between the two cohorts. As compared to TARGET cohort, SCMC cohort had more *KMT2A-SEPT6* (6.98% in SCMC vs 2.06% in TARGET) and *KMT2A-AFF1* (6.98% vs 2.06%) fusions and less *KMT2A-MLLT4* (2.33% vs 8.25%) fusion (Supplementary Figure 6d).

## Supplementary Figures

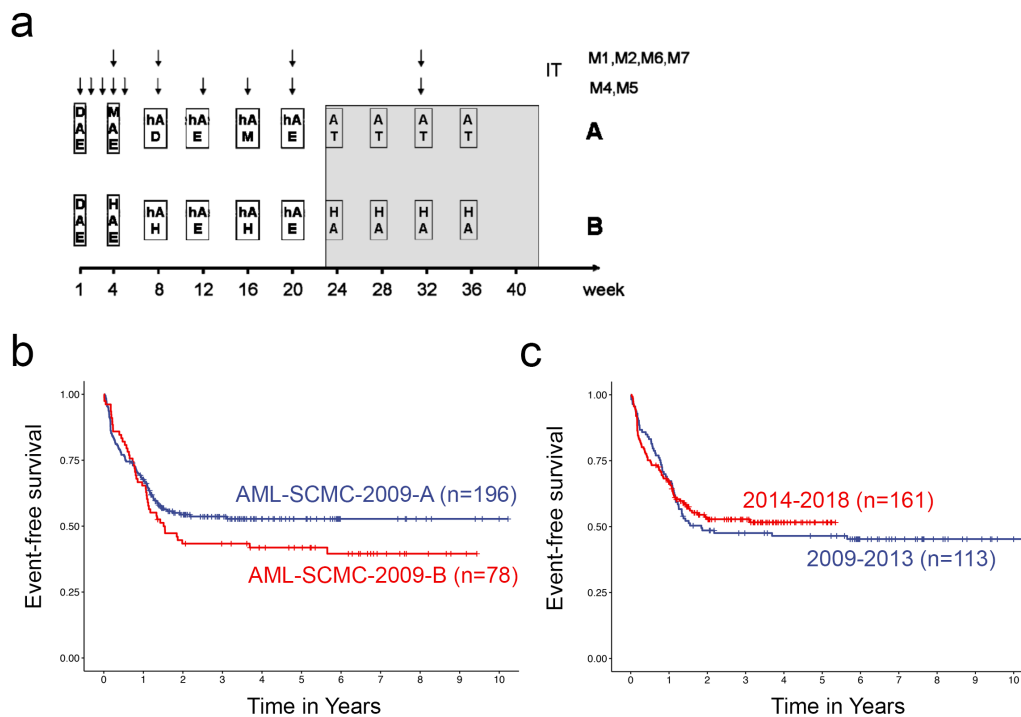

**Supplementary Figure 1. Treatment protocol of pediatric AML patients enrolled in the study.** (a) Schema of AML-SCMC-2009 protocol (Methods). IT, intrathecal therapy. (b) Kaplan-Meier estimate of event-free survival between patients treated on AML-SCMC-2009-A and AML-SCMC-2009-B ( $P=0.207$ ). (c) Kaplan-Meier estimate of event-free survival between patients treated on AML-SCMC-2009 protocol during 2009-2013 and 2014-2018 ( $P=0.655$ ).  $P$  value was calculated with log-rank test for (b) and (c).

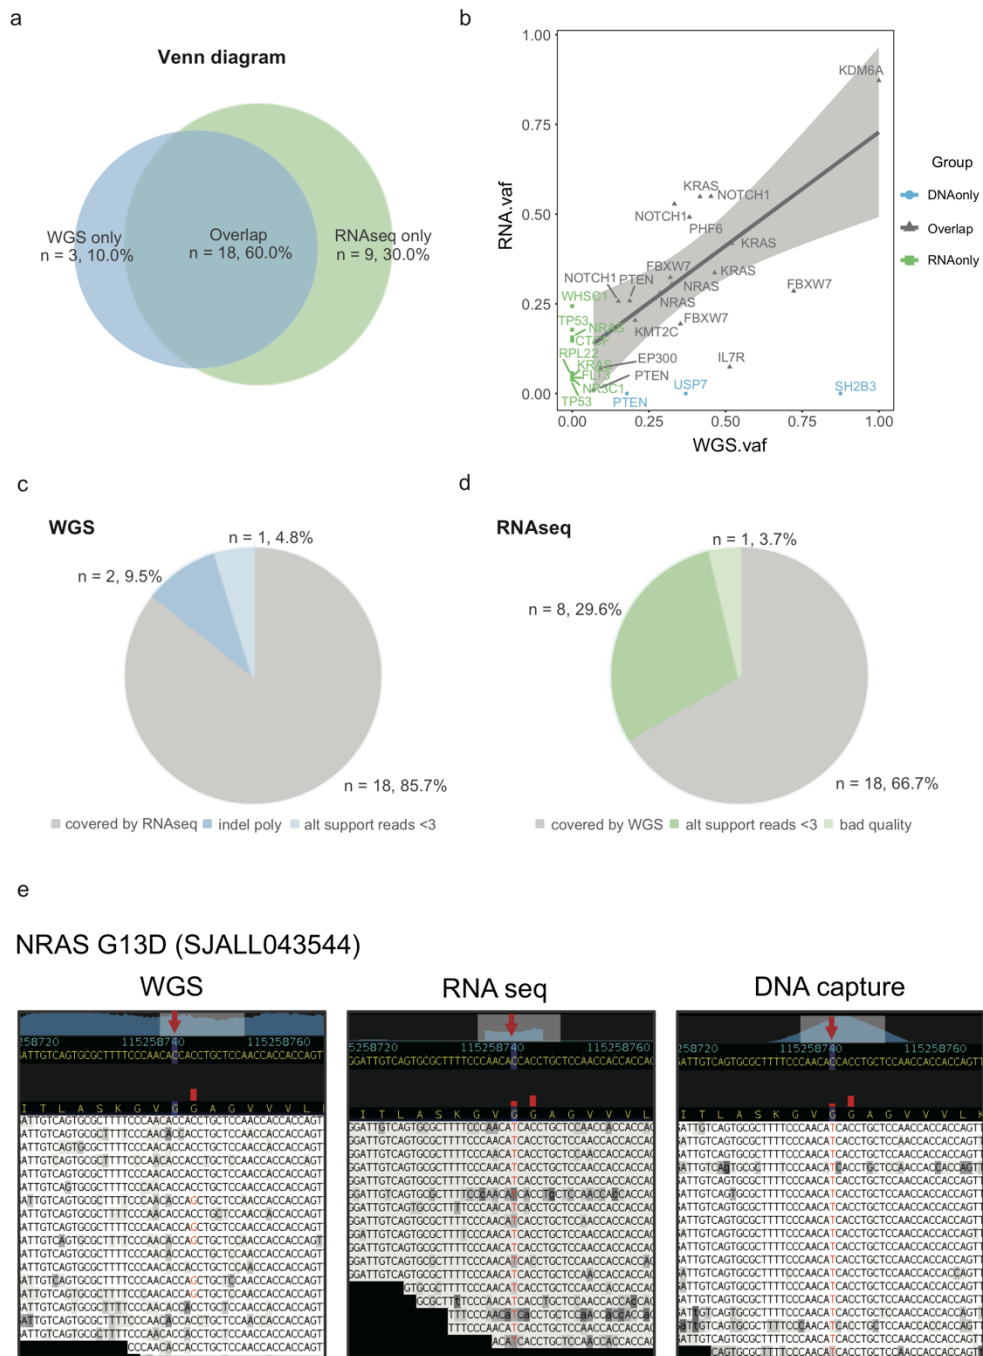

**Supplementary Figure 2. Evaluation and validation of driver mutations analyzed from RNA-seq.** (a) Potential driver mutations called from matched whole genome sequencing (WGS) and RNA-seq collected from 10 diagnosis ALL cases were compared and showed in Venn diagram. (b) Variant allele frequency (VAF) for each mutation detected in WGS (x-axis) and RNA-seq (y-axis) was shown in scatter plot. Mutations detected in RNA-seq only were labeled in green and aligned to the left of the plot, while mutations detected in WGS only were showed in blue and aligned to the

bottom of the plot. Grey shading represented 95% confidence interval in the linear regression of RNA-seq VAF and WGS VAF of mutations detected in both experiments. (c) Breakdown of mutations detected in WGS was shown with pie charts. Grey indicated mutations detected by both WGS and RNA-seq (n = 18); dark blue indicated mutations detected in WGS but not RNA-seq due to false negative results in indel calls with repeated sequences (n = 2) (indel poly); light blue indicated mutations detected in WGS only due to mutant reads from RNA-seq < 3 (n = 1). (d) Breakdown of mutations detected in RNA-seq. Grey, mutations detected in both WGS and RNA-seq (n = 18); dark green, mutations detected in RNA-seq only due to insufficient mutant allele (< 3) in WGS (n = 8); light green, mutations detected in RNA-seq only due to bad sequencing quality in WGS (n = 1). (e) Validation of mutations detected in RNA-seq but not WGS by DNA capture sequencing. *NRAS* G13D from one sample, (SJALL043544) was shown as an example. All reads from WGS were wild type (left), while mutant reads (in red) could be detected by both RNA-seq (middle) and DNA capture sequencing (right).

**Supplementary Figure 3. Driver sequence mutations in SCMC and TARGET pediatric AML.** Potential driver sequence mutations detected in Eastern (SCMC) and Western (TARGET) cohort were shown with ProteinPaint. The genes shown in this figure were the same as shown in Figure 2b.

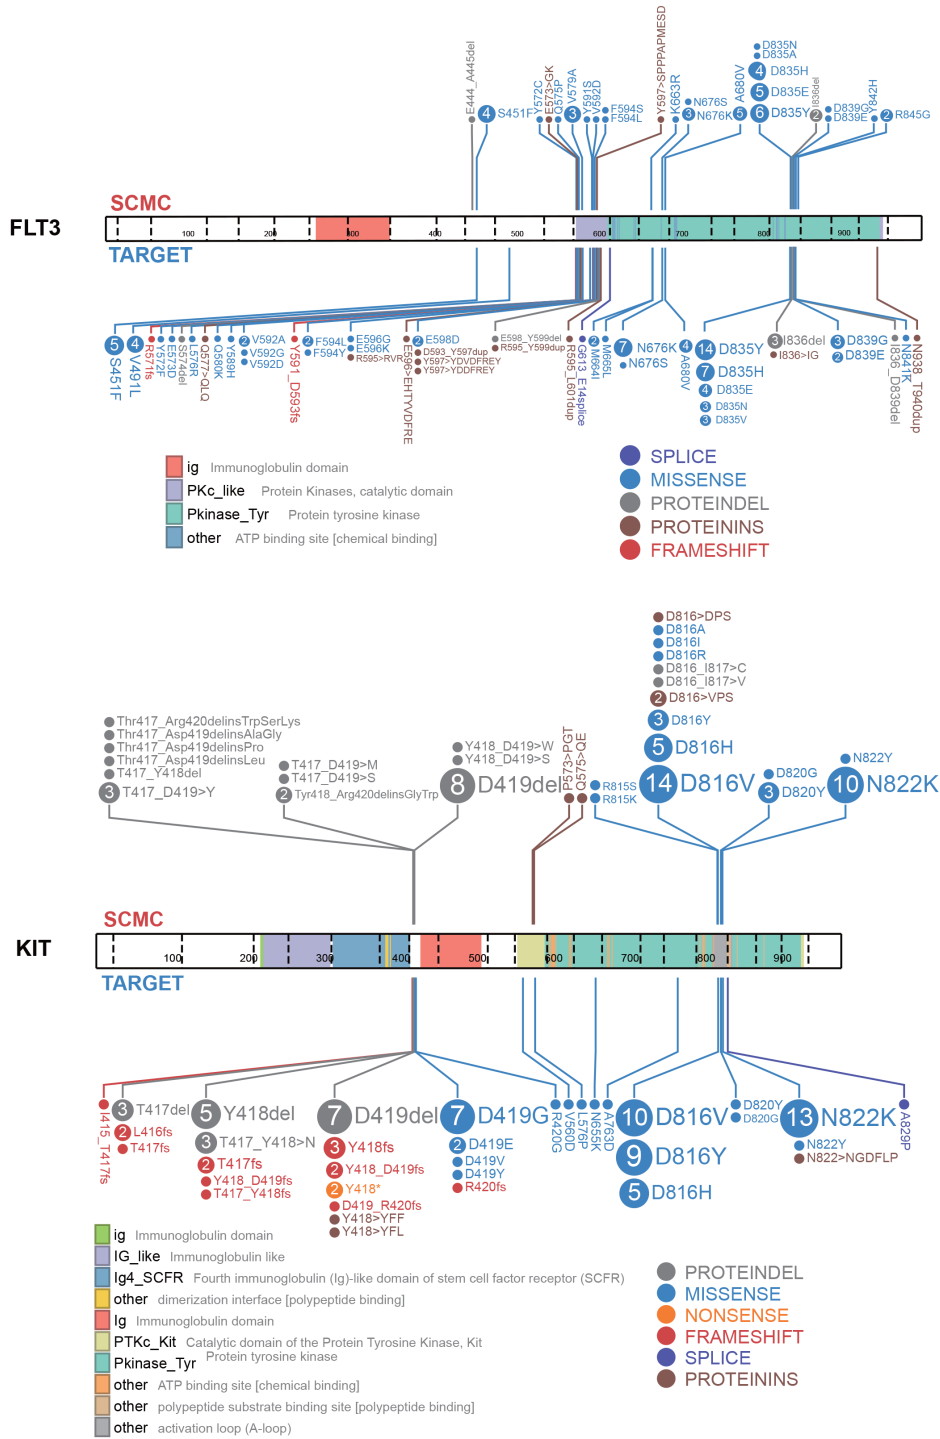

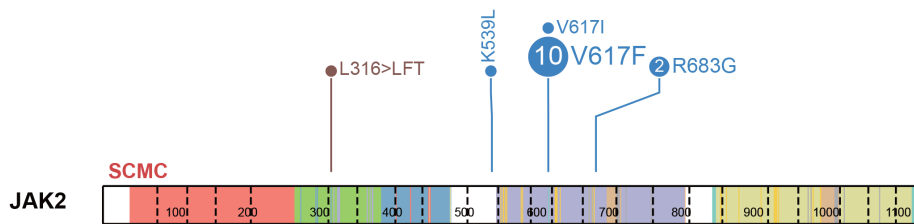

- B41 Band 4.1 homologues
  - FERM\_C\_JAK2 FERM domain C-lobe of Janus kinase (JAK) 2
  - other putative phosphoinositide binding site [chemical binding]
  - other putative peptide binding site [polypeptide binding]
  - other putative actin binding site 2 [polypeptide binding]
  - SH2\_Jak2 Src homology 2 (SH2) domain in the Janus kinase 2 (Jak2) proteins
  - other phosphotyrosine binding pocket [polypeptide binding]
  - other hydrophobic binding pocket [polypeptide binding]
  - PTK\_Jak2\_rpt1 Pseudokinase (repeat 1) domain of the Protein Tyrosine Kinase, Janus kinase 2
  - Pkinase\_Tyr Protein tyrosine kinase
  - other ATP binding site [chemical binding]
  - other V617F mutation site
  - other polypeptide substrate binding site [polypeptide binding]
  - other activation loop (A-loop)
  - PTKc\_Jak2\_rpt2 Catalytic (repeat 2) domain of the Protein Tyrosine Kinase, Janus kinase 2
  - TyrKc Tyrosine kinase, catalytic domain
- PROTEININS
  - MISSENSE

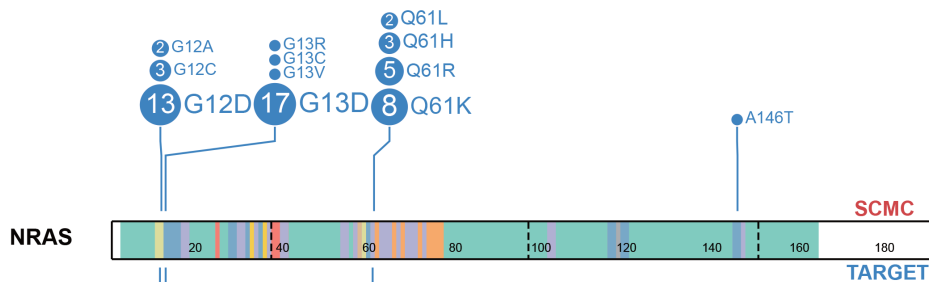

- H\_N\_K\_Ras\_like Ras GTPase family containing H-Ras, N-Ras and K-Ras4A/4B
  - other G1 box
  - other putative GDI interaction site [polypeptide binding]
  - other GTP/Mg2+ binding site [chemical binding]
  - other GEF interaction site [polypeptide binding]
  - other effector interaction site
  - other Switch I region
  - other G2 box
  - other G3 box
  - other Switch II region
  - other G4 box
  - other G5 box
- MISSENSE

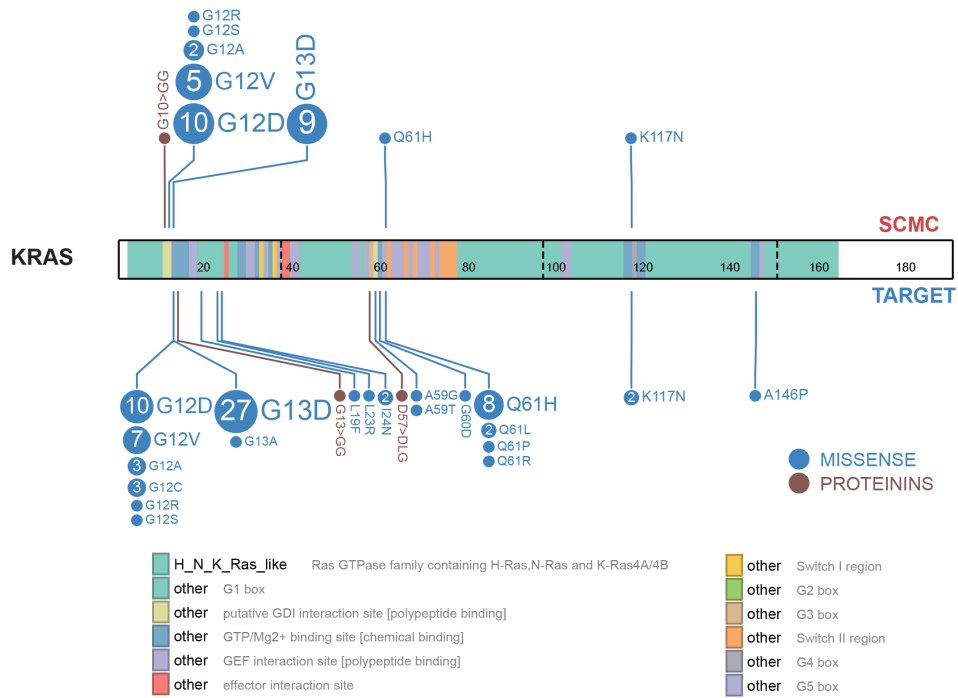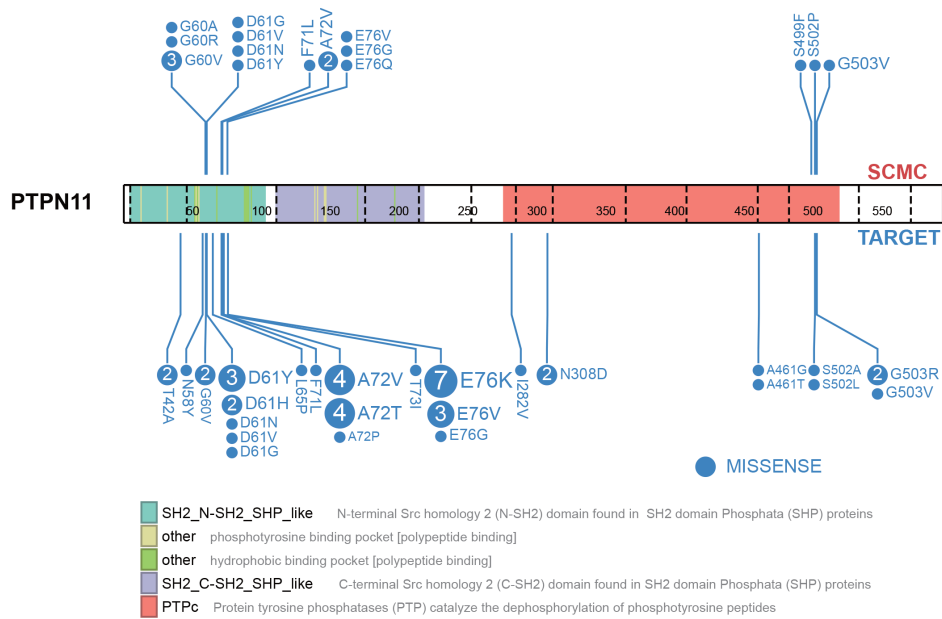



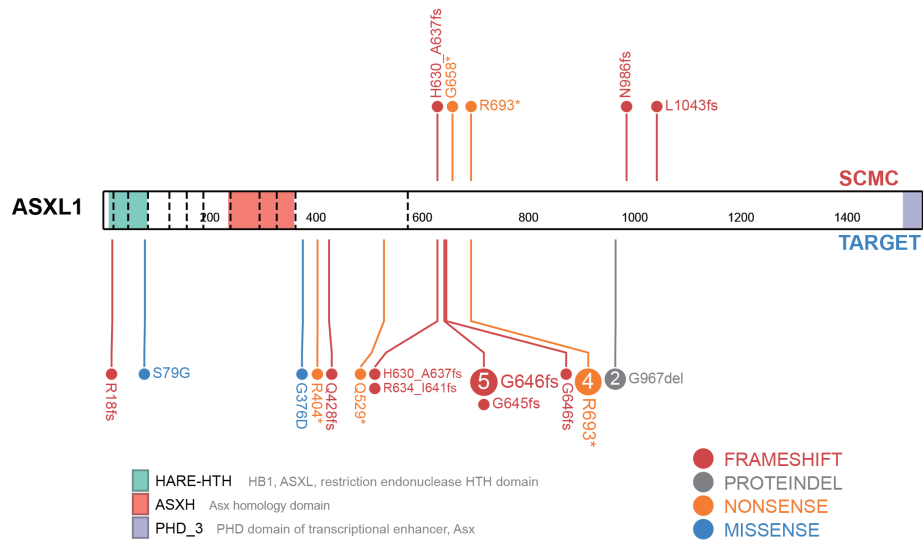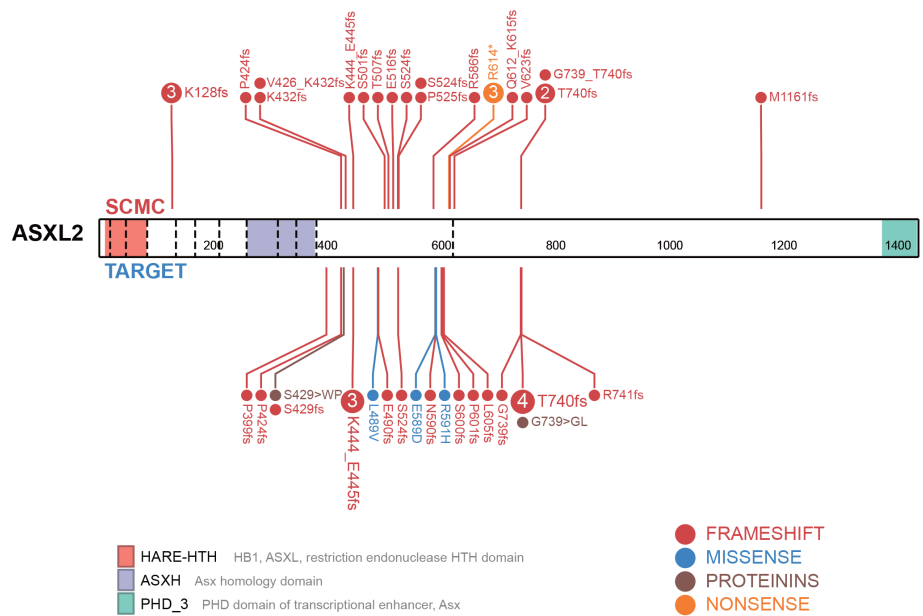

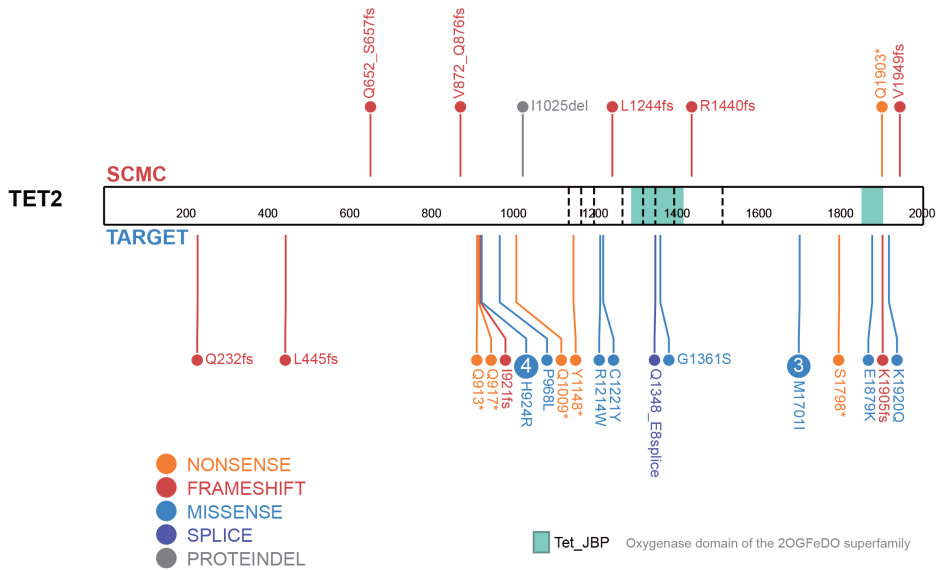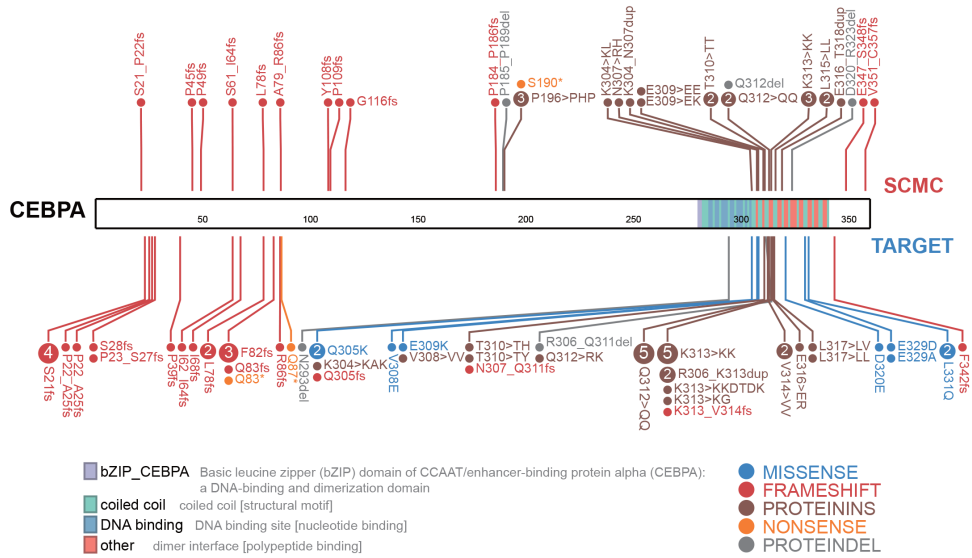

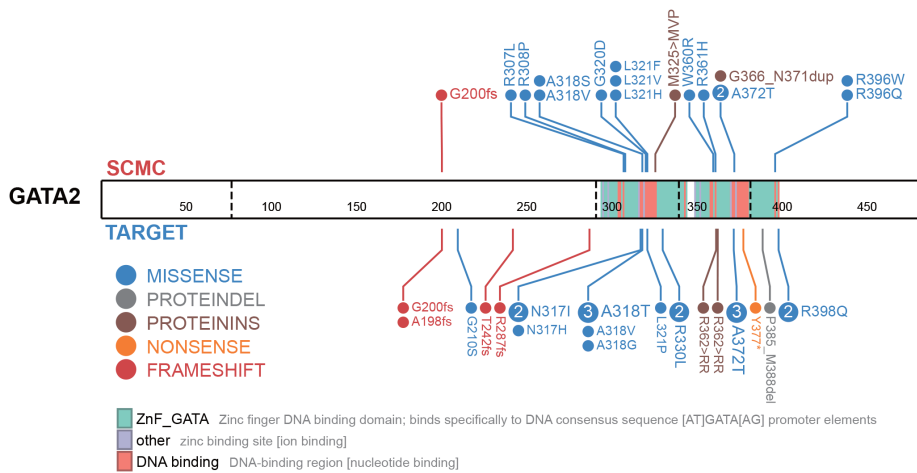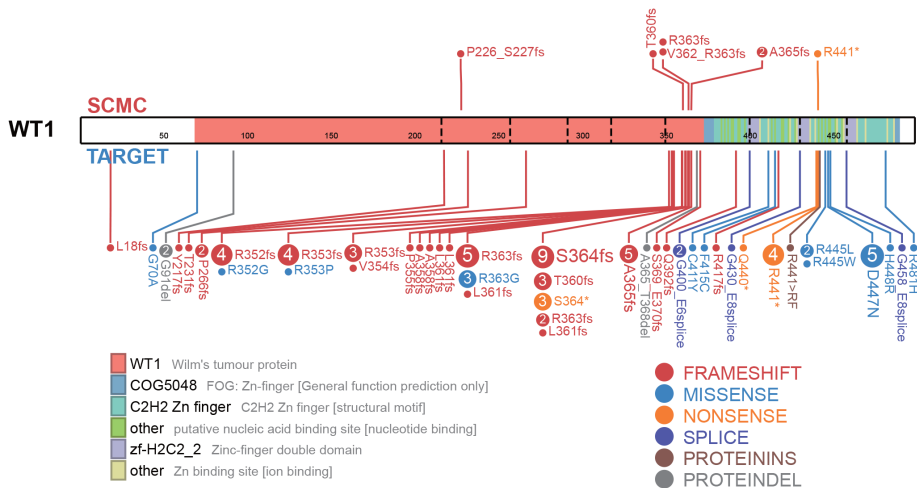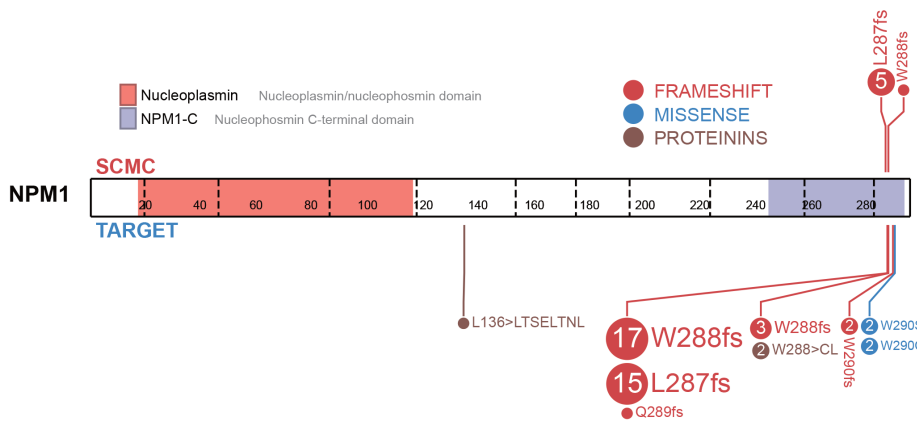

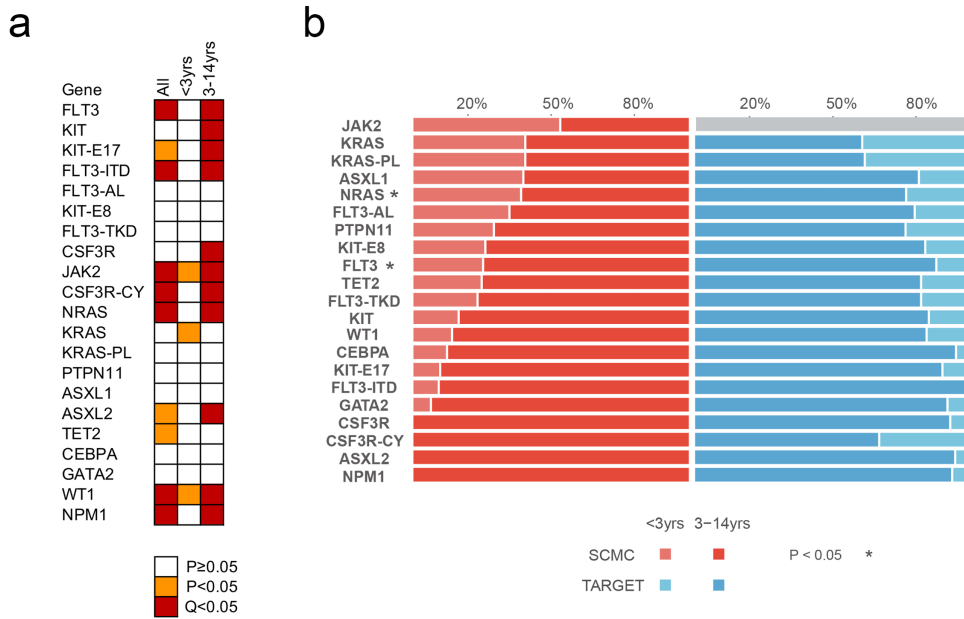

**Supplementary Figure 4. Comparison of mutation frequency by age group in Chinese (SCMC) and Western (TARGET) pediatric AML.** Genes or hotspots within driver gene with mutation frequency greater than 4% in either SCMC or TARGET cohort were included. Patients were breakdown into age groups of <3yrs and 3-14yrs. Mutation frequency between the two cohorts within each age group was compared (a). The composition of patients from two age groups were compared between SCMC and TARGET cohort and showed in (b). Two-sided Fisher's exact test was applied in this analysis.

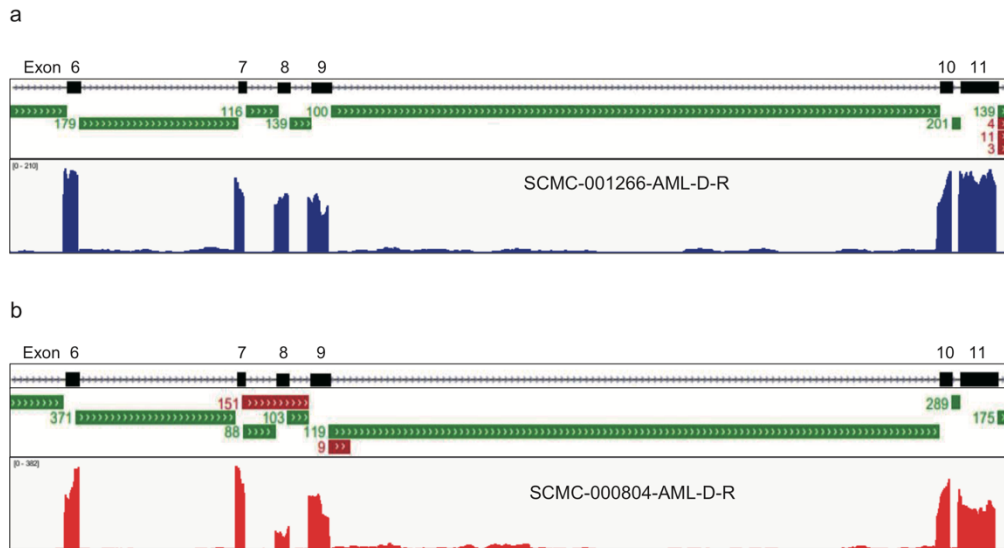

**Supplementary Figure 5. *CBL* exon8/9 deletions detected by RNA-seq in pediatric AML patients.** Junction analysis of *CBL* gene was applied and combined with coverage analysis to identify *CBL* exon8/9 deletion. Two cases were shown with IGV, as examples for *CBL* wild type (SCMC-001266-AML-D-R) in (a) and deletion (SCMC-000804-AML-D-R) in (b). In each panel, exon 6 to 11 of *CBL* gene was shown on the top, with the junctions between *CBL* exons showed in the middle and coverage plot from RNA-seq at the bottom. The wild type junctions were shown in green and abnormal ones in red. The number of reads representing each junction was labeled on left of each junction.

a

|          |                      | SCMC              |                      |                      | TARGET            |                      |                     | P-value<br>(SCMC vs TARGET) |
|----------|----------------------|-------------------|----------------------|----------------------|-------------------|----------------------|---------------------|-----------------------------|
|          |                      | Patients<br>n=288 | 5-year EFS<br>49.20% | 95%CI<br>0.435-0.557 | Patients<br>n=498 | 5-year EFS<br>49.20% | 95%CI<br>0.45-0.539 |                             |
| Fusion   | KMT2A rearrangements | n=43              | 56.30%               | 0.428-0.74           | n=97              | 39.90%               | 0.312-0.51          | 0.111                       |
|          | RUNX1-RUNX1T1        | n=82              | 55.30%               | 0.448-0.682          | n=79              | 69.10%               | 0.595-0.802         | 0.102                       |
|          | CBFA2T3-GLIS2        | n=12              | 16.70%               | 0.047-0.591          | n=4               | NA                   | NA                  | 0.991                       |
|          | CBFB-MYH11           | n=10              | 80.00%               | 0.587-1              | n=72              | 60.80%               | 0.505-0.733         | 0.381                       |
|          | NUP98-NSD1           | n=5               | NA                   | NA                   | n=21              | 28.60%               | 0.145-0.562         | 0.591                       |
|          | KMT2A-MLLT3          | n=16              | 64.80%               | 0.436-0.962          | n=34              | 58.30%               | 0.437-0.777         | 0.565                       |
|          | KMT2A-MLLT10         | n=10              | 40.00%               | 0.187-0.855          | n=24              | 25.00%               | 0.125-0.5           | 0.663                       |
| Mutation | FLT3                 | n=55              | 39.30%               | 0.279-0.553          | n=158             | 45.90%               | 0.386-0.545         | 0.288                       |
|          | KIT                  | n=51              | 41.70%               | 0.29-0.598           | n=65              | 56.10%               | 0.451-0.698         | 0.216                       |
|          | NRAS                 | n=50              | 42.50%               | 0.305-0.592          | n=157             | 52.50%               | 0.452-0.61          | 0.102                       |
|          | KRAS                 | n=27              | 58.80%               | 0.428-0.809          | n=71              | 40.80%               | 0.307-0.542         | 0.230                       |
|          | CEBPA                | n=23              | 77.10%               | 0.612-0.972          | n=36              | 59.50%               | 0.452-0.784         | 0.211                       |
|          | PTPN11               | n=17              | 29.40%               | 0.141-0.614          | n=42              | 44.20%               | 0.314-0.624         | 0.271                       |

b

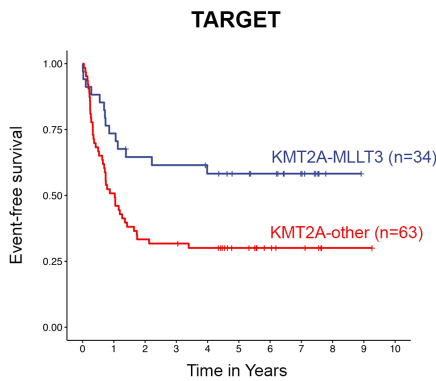

c

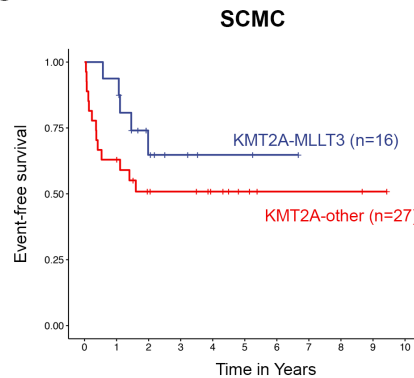

d

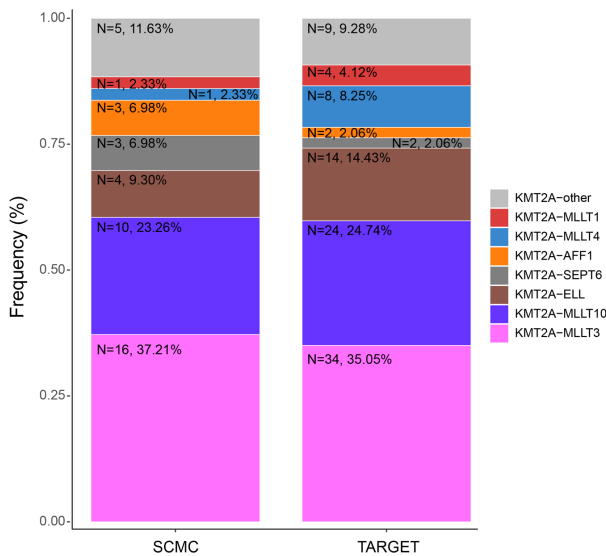

**Supplementary Figure 6. Clinical impact of driver genomic aberrations in Chinese (SCMC) and Western (TARGET) pediatric AML.** Only patients younger than 15-year-old were included. (a) Event-free survival analysis of cases carrying driver fusions and mutations between SCMC and TARGET cohort. Patients without sufficient follow-up information was excluded from this analysis (n=3 for *KIT*, n=1 for *NRAS* and *CEBPA* each). (b) and (c) Event-free survival analysis of AMLs carrying

*KMT2A-MLLT3* fusion versus other *KMT2A* rearrangements in TARGET and SCMC cohort, respectively. (d) The constitution of *KMT2A* rearrangements in SCMC (left) and TARGET (right). *P* values were calculated with log-rank test.

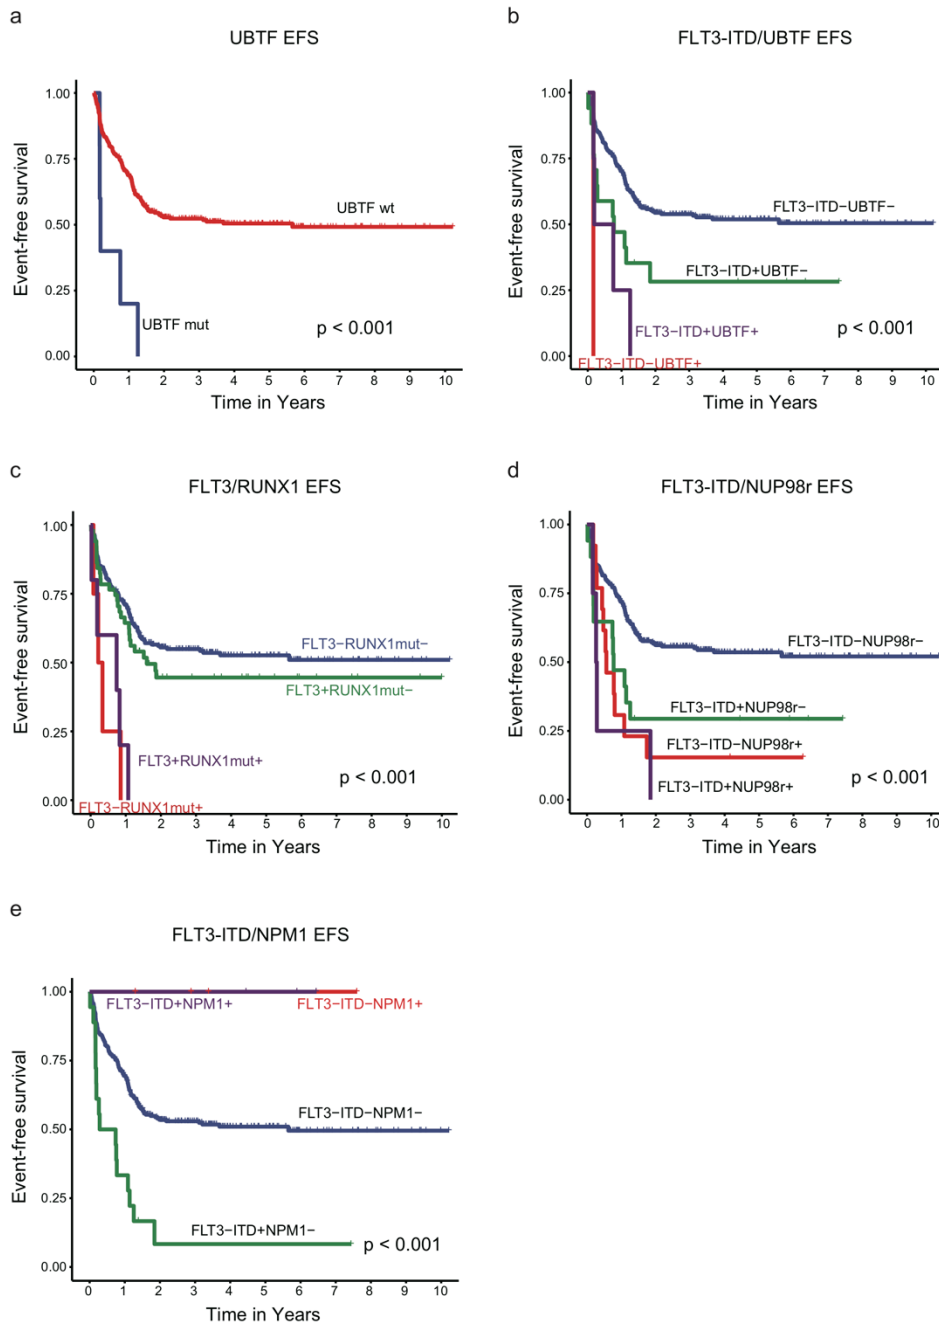

**Supplementary Figure 7. Clinical impact of genetic alterations on event free survival of AML patients.** (a) Kaplan-Meier estimates of EFS of Chinese AML patients with *UBTF* mutation ( $n = 5$ ) and wild type ( $n = 283$ ).  $P = 3.712E-04$ . (b) Kaplan-Meier estimates of EFS of patients carrying both *FLT3*-ITD and *UBTF* mutation ( $n = 4$ ); *FLT3*-ITD alone ( $n = 17$ ); *UBTF* alone ( $n = 1$ ) and wild type for both ( $n = 266$ ).  $P = 6.737E-05$  (c) Kaplan-Meier estimates of EFS of patients with both *FLT3* (including ITD) and *RUNX1* sequence mutation ( $n = 5$ ); *FLT3* mutation alone ( $n = 51$ ); *RUNX1* alone ( $n = 4$ ) and wild type for both ( $n = 228$ ).  $P = 3.553E-06$ . (d) Kaplan-Meier estimates of EFS



of patients with *FLT3*-ITD and *NUP98* rearrangement (n = 4); *FLT3*-ITD alone (n = 17); *NUP98* rearrangement alone (n = 13) and wild type for both (n = 254).  $P = 2.561E-05$ .

(e) Kaplan-Meier estimates of EFS of patients with *FLT3*-ITD and *NPM1* mutation (n = 3); *FLT3*-ITD alone (n = 18); *NPM1* mutation alone (n = 4) and wild type for both (n = 263).  $P = 4.609E-06$ .  $P$  values were calculated with log-rank test in each panel.

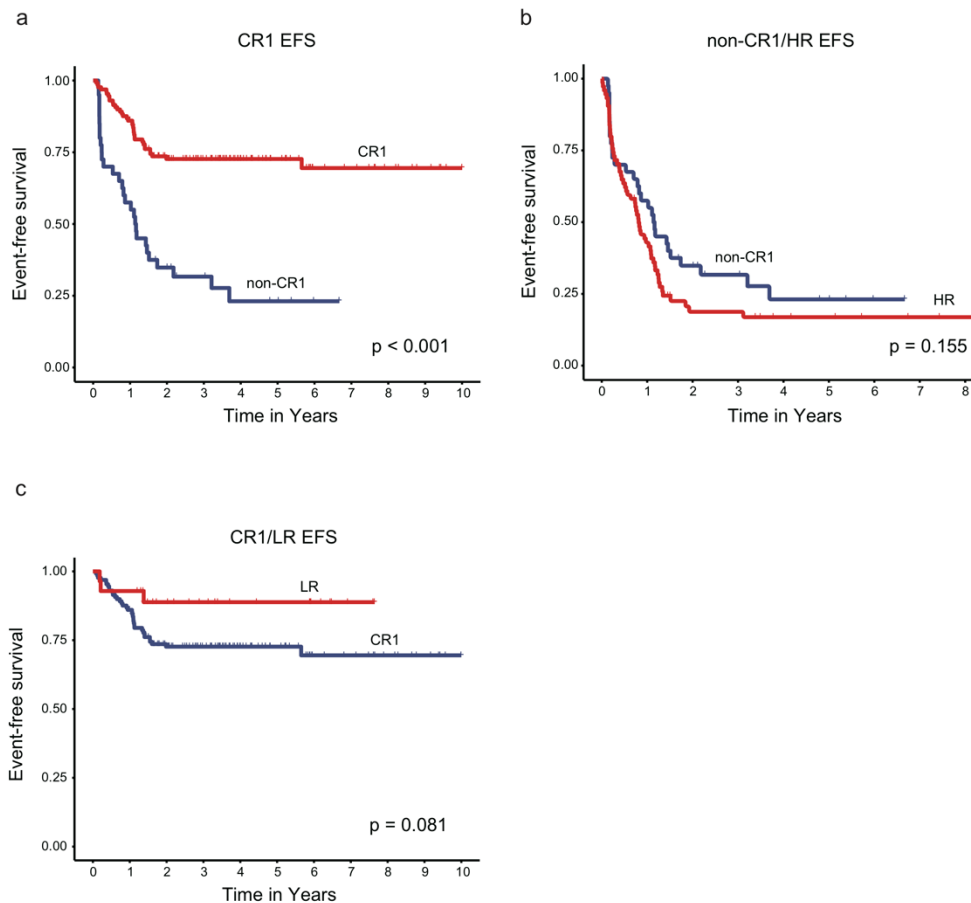

**Supplementary Figure 8. Impact of treatment response on event free survival of patients negative for prognosis associated genomic alteration.** (a) Kaplan-Meier estimates of EFS of Chinese AML patients reached complete response in 1<sup>st</sup> round treatment (CR1,  $n = 129$ ) or not (non-CR1,  $n = 40$ ).  $P = 1.283E-08$ . (b) Kaplan-Meier estimates of EFS of non-CR1 patients ( $n = 40$ ) and high risk patients (HR,  $n = 74$ ) defined as positive for genomic alterations associated with inferior outcome (Results and Supplementary Table 12). (c) Kaplan-Meier estimates of EFS of CR1 patients ( $n = 129$ ) and low risk patients (LR,  $n = 28$ ) defined as carrying genetic alterations associated with favorable outcome (Results and Supplementary Table 12).  $P$  values were calculated with log-rank test in each panel.

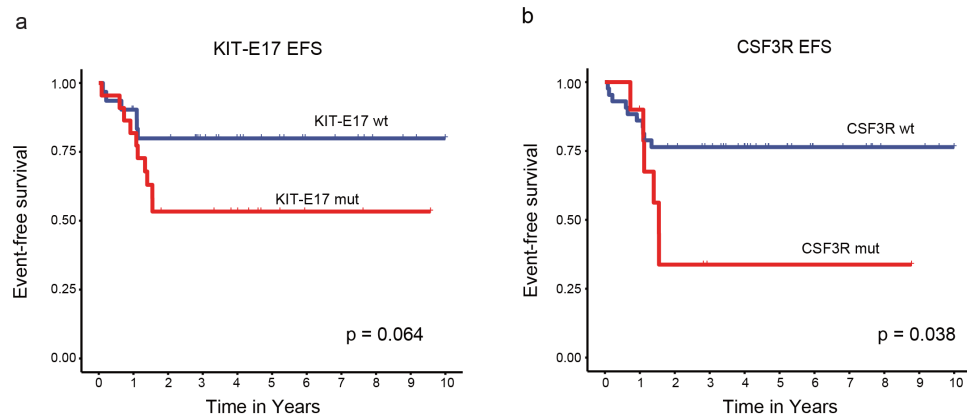

**Supplementary Figure 9. Impact of *KIT-E17* and *CSF3R* mutations on event free survival of CR1 *RUNX1-RUNX1T1* positive AML patients.** (a) Kaplan-Meier estimates of EFS of CR1 *RUNX1-RUNX1T1* positive AML patients with *KIT-E17* mutation (n = 22) or wild type (n = 31). (b) Kaplan-Meier estimates of CR1 patients carrying *CSF3R* mutation (n = 10) or not (n = 43). *P* values were calculated with log-rank test in each panel.

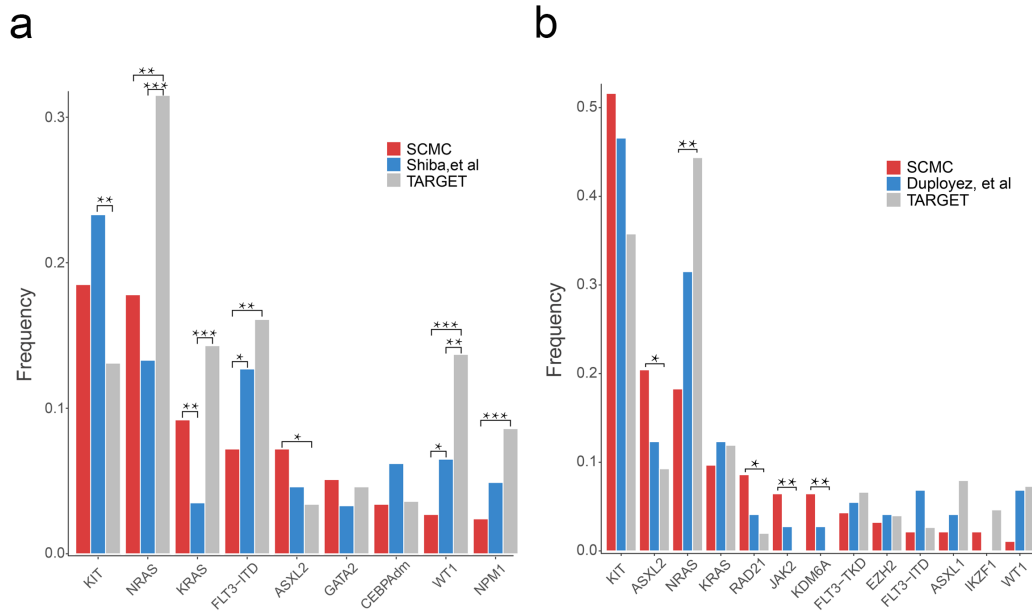

**Supplementary Figure 10. Comparison of driver mutation recurrence between East and West pediatric AML cohorts.** Genomic aberrations reported by Shiba et al and Duployez et al were analyzed, representing Japanese pediatric AML (a) and French pediatric CBF AML cohort (b) respectively. Patients under 18-year-old were included in this analysis. \*  $P < 0.05$ , \*\*  $P < 0.01$ , \*\*\*  $P < 0.001$ , two-sided Fisher's exact test. Exact  $P$  values for each comparison were present in Supplementary Data 16.

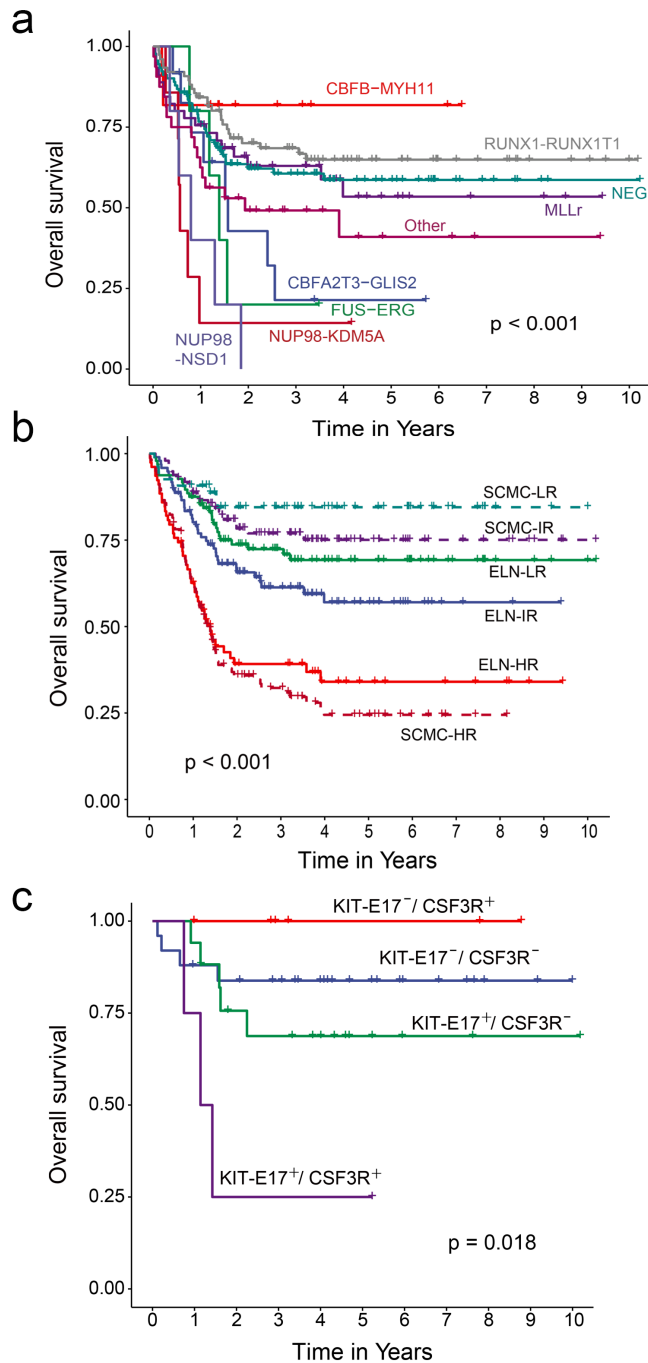

**Supplementary Figure 11. Overall survival (OS) analysis of Chinese pediatric AML.** Kaplan-Meier estimate the OS of Chinese pediatric AML patients diagnosed and treated at SCMC, grouped by fusions (**a**) ( $P = 4.700E-05$ ); risk groups as stratified by revised SCMC-pAML or ELN model (**b**) ( $P = 8.095E-20$ ); and *CSF3R* and *KIT-E17* mutation status within *RUNX1-RUNX1T1* positive patients reached complete remission after the 1<sup>st</sup> cycle of induction therapy (**c**).  $P$  values were calculated with log-rank test in each panel.
