# Supplementary material for: Distinct genomic landscape of Chinese pediatric acute myeloid leukemia impacts clinical risk classification
Source: PubMed Central journal article supplement (PMC8960760; doi:10.1038/s41467-022-29336-y), 2022-03-28
Supplement: 41467_2022_29336_MOESM2_ESM.pdf [file 41467_2022_29336_MOESM2_ESM.pdf]

## Description of Additional Supplementary Files

File Name: Supplementary Data 1

Description: Patient Information.

File Name: Supplementary Data 2

Description: Clinical characterization of SCMC and TARGET AML cohort.

File Name: Supplementary Data 3

Description: QC of RNAseq data.

File Name: Supplementary Data 4

Description: Fusions identified from RNA-seq.

File Name: Supplementary Data 5

Description: Comparison of mutations discovered from WGS and RNA-seq.

File Name: Supplementary Data 6

Description: Sequence mutations identified from RNA-seq analysis.

File Name: Supplementary Data 7

Description: Internal Tandem Duplication identified from RNA-seq analysis.

File Name: Supplementary Data 8

Description:

- a. Comparison of mutation frequencies in AML between East and West population.
- b. Mutation composition in different age groups

File Name: Supplementary Data 9

Description: CBL deletions.

File Name: Supplementary Data 10

Description: Driver genes and the associated pathways.

File Name: Supplementary Data 11

Description: Pairwise association between driver genes.

File Name: Supplementary Data 12

Description: Associations between driver mutations and eventfree survival.

File Name: Supplementary Data 13

Description:

- a. Univariate Cox analysis.
- b. Multivariate Cox analysis.

File Name: Supplementary Data 14

Description: SCMC-pAML model for risk stratification.

File Name: Supplementary Data 15

Description: Multivariable Cox models for different risk group classification.

File Name: Supplementary Data 16

Description: Comparison of genomic aberrations among different pediatric AML cohort.
